# Supplementary material for: Competition and cooperation with virtual players in an exergame
Source: PeerJ journal article supplement (doi:10.7717/peerj-cs.92), 2016-10-31
Supplement: Study_1_Data.csv [file Study_1_Data.csv]

Participant	ControlDistance	ControlCalories	GhostDistance	GhostCalories	TrainerDistance	TrainerCalories	Gender	Age	BMI	ExerciseHoursCategory	PercFitness	Tired	VGHours	PlayedExG	Control_RPE	Control_Enjoyed	Control_Motivating	Ghost_RPE	Ghost_Enjoyed	Ghost_Motivating	PrevMotiv	Trainer_RPE	Trainer_Enjoyed	Trainer_Motivating
1	5.37	93	5.63	113	5.5	114	1	36	23.56	4	8	8	1	1	15	7	7	15	7	7	7	15	7	7
2	3.1	65	3.16	67	2.96	66	2	54	20.83	4	7	5	1	0	17	7	7	18	7	7	7	20	7	7
3	3.51	72	3.02	63	3.13	66	1	21	24.22	3	4	7	6	1	15	6	7	17	7	7	7	14	6	7
5	4.01	80	3.86	76	3.34	81	1	45	23.3	3	7	3	2	0	17	6	5	17	6	5	7	18	5	5
6	4.86	98	5.19	105	4.06	78	1	26	26.07	3	7	3	4	1	17	6	6	18	7	7	7	18	6	5
7	3.4	68	3.78	73	3.64	72	1	25	31.2	2	4	5	6	1	17	4	5	15	5	5	7	16	4	5
8	4.9	93	4.59	85	4.6	95	1	27	21.53	4	7	5	1	1	16	6	7	17	7	7	7	17	7	7
9	3.2	68	3.45	71	2.64	60	2	31	25.24	3	3	4	1	0	17	6	7	19	6	6	6	15	7	7
11	4.55	91	4.98	94	4.26	83	1	45	30.38	4	5	6	2	1	15	6	6	14	7	7	7	16	6	6
12	4.81	91	4.83	90	4.75	89	1	35	28.73	3	3	2	4	1	17	5	6	18	5	4	5	17	4	6
13	4.51	86	4.49	84	3.41	67	1	24	23.15	2	7	1	2	1	16	6	7	18	6	7	7	14	6	7
14	3.3	67	2.4	57	2.54	59	2	24	20.7	4	5	4	1	1	15	6	6	17	6	6	2	16	5	5
15	3.57	70	3.54	68	3.25	65	1	25	19.15	1	2	6	4	1	16	6	6	15	6	6	7	16	5	6
16	4.62	91	5.05	97	4.16	80	1	41	22.72	3	7	3	2	1	17	3	2	19	6	6	7	17	5	5
17	4.05	80	3.71	72	3.26	68	1	27	26.56	5	9	8	3	1	15	7	6	18	7	7	7	20	7	7
18	2.95	62	3.12	64	2.73	60	1	24	18.39	4	5	3	4	0	16	6	5	17	7	6	7	16	6	6
19	4.08	81	4.64	87	3.12	64	1	32	27.17	5	8	1	4	1	13	6	6	15	6	6	2	13	2	2
20	3.41	72	3.55	71	3.37	69	2	22	20.81	4	6	5	1	0	15	5	5	18	7	7	7	18	6	6
21	3.4	68	3.56	67	3.08	63	1	34	23	4	7	5	1	1	13	2	2	14	2	3	5	15	1	2
